# Supplementary material
Source: PubMed Central journal article supplement (PMC3518558)
Supplement: NIHMS410949-supplement-1.pdf [file NIHMS410949-supplement-1.pdf]

## Supplemental material

**Supplemental Table 1. Bacterial Strains.** Name, genotype and source of all bacterial strains used in this study. Details of construction of strains can be found in full methods for strains constructed in this work, or in the respective cited reference.

| Strain   | Genotype                                                                                                       | Source or Reference |
|----------|----------------------------------------------------------------------------------------------------------------|---------------------|
| 86-24    | Stx+ EHEC strain serotype O157:H7                                                                              | <sup>1</sup>        |
| ARP01    | 86-24 <i>fusK</i> isogenic mutant                                                                              | This work           |
| ARP02    | 86-24 <i>fusR</i> isogenic mutant                                                                              | This work           |
| ARP03    | pARP10 in TOP10                                                                                                | This work           |
| ARP04    | pARP11 in TOP10                                                                                                | This work           |
| ARP05    | pARP10 in <i>fusK</i> -                                                                                        | This work           |
| ARP06    | pARP11 in <i>fusR</i> -                                                                                        | This work           |
| ARP15    | 86-24 <i>z0461</i> mutant                                                                                      | This work           |
| ARP09    | <i>fusK</i> - complemented pARP12                                                                              | This work           |
| ARP10    | <i>fusR</i> - complemented pARP13                                                                              | This work           |
| ARP11    | 86-24 <i>fusK</i> - <i>fucR</i> - double mutant                                                                | This work           |
| ARP12    | 86-24 <i>ler</i> isogenic mutant                                                                               | This work           |
| BL21     | F- <i>ompT hsdSB(rB-, mB-) gal dcm</i><br>(DE3)                                                                | Invitrogen          |
| TOP 10   | Host <i>E. coli</i> strain for protein expression<br>from pBADMyHis vector                                     | Invitrogen          |
| DH5alpha | <i>supE44 D(argF-lac)U169</i><br><i>(<math>\Delta</math>80dlac<math>\Delta</math>(Z)M15) deoR hsdR17 recA1</i> | Stratagene          |

|       |                                 |   |
|-------|---------------------------------|---|
|       | <i>endA1 gyrA96 thi-1 relA1</i> |   |
| VS138 | <i>qseC</i> isogenic mutant     | 2 |
| MC474 | <i>qseB</i> isogenic mutant     | 3 |
| NR01  | <i>qseE</i> isogenic mutant     | 4 |
| NR02  | <i>qseF</i> isogenic mutant     | 4 |

**Supplemental Table 2. Plasmids.** Name, genotype and source of all plasmids used in this study. Details of construction of plasmids can be found in full methods for plasmids constructed in this work, or in the respective cited reference.

| Plasmids       | Genotype                                                                           | Source or Reference |
|----------------|------------------------------------------------------------------------------------|---------------------|
| pBADMycHis A   | C-terminal Myc-His-Tag vector                                                      | Invitrogen          |
| pACYC184       | Cloning vector                                                                     | New England biolabs |
| pKD3           | pANTS $\lambda$ derivative containing<br>FRT-flanked chloramphenicol<br>resistance | <sup>5</sup>        |
| pKD46          | $\lambda$ red recombinase expression plasmid                                       | <sup>5</sup>        |
| pCP20          | TS replication and thermal induction<br>of FLP synthesis                           | <sup>5</sup>        |
| TOPO PCR blunt | Commercial blunt end cloning vector                                                | Invitrogen          |
| pARP10         | FusK in pBADMycHisA                                                                | This study          |
| pARP11         | FusR in pBADMycHisA                                                                | This study          |
| pARP12         | <i>fusK</i> in pACYC184                                                            | This study          |
| pARP13         | <i>fusR</i> in pACYC184                                                            | This study          |
| pARP05         | <i>fusK</i> in TOPO                                                                | This study          |
| pARP06         | <i>fusR</i> in TOPO                                                                | This study          |
| TOPO fusR-up   | 326 bp upstream region of fusR in<br>TOPO                                          | This study          |
| pVS154         | QseB in pBADMycHis                                                                 | <sup>2</sup>        |

pNR02

| QseF in pBADMycHis

4

**Supplemental Table 3. Oligonucleotides.** Sequence of oligonucleotides synthesized specifically for this study are listed, sequence for oligonucleotides previously reported in other studies are referenced.

|                  | <b>Primers used for mutagenesis and cloning</b>                                                   |
|------------------|---------------------------------------------------------------------------------------------------|
| Z0462lambdaredP1 | TTAATGTCGCGCCAATCTTCGTCATTGGGTGATTTTG<br>CTGTTTATTGTGCTAGCCTGGGGAGTGTAGGTTGGAGCTTGCTTC            |
| Z0462lambdaredP2 | CGGGATACCTAAGACTTTTTCTGGTTATCCGGCGATT<br>GTTGCAAAAATGTGGGCAAGTCATATGAATATCCTCCTTA                 |
| Z0462F           | AAGCTTATTCGCGCAATCTTCG Clone <i>fusK</i> in pBADMyc His                                           |
| Cz0462rev        | AAGCTTATTCGGCGATTTGTTGC Clone <i>fusK</i> in pBADMycHis                                           |
| Z0462for         | GTCGACTCGGCTCGACCACCATCTGC Clone <i>fusK</i> in pACYC184                                          |
| Z0462rev         | TCTAGATGAACGCGCGTGCA Clone <i>fusK</i> in pACYC184                                                |
| Z0463lambdaredP1 | ATTAGATAATAAGAGAAGAAAAGTATGATTCGGGTA<br>GTGCTGGTGGATGACCATGTTGTGGTGTAGGCTGGAGCTGCTTC              |
| Z0463lambdaredP2 | TCCCCAGGCTAGCACAATAAACAGCAAAAATCACCCAA<br>TGACGAAGATTGCGCGACATTAACATATGAATATCCTCCTTA              |
| z0463f2          | AAGCTTCCATTCGGGTAGTGCTGG Clone <i>fusR</i> in pBADMyc His                                         |
| Z0463r2          | AAGCTTAATGCCCCGCCAGCAG Clone <i>fusR</i> in pBADMyc His                                           |
| Z0463for         | GTCGACGTTGATTGCCAGCGCCGCGC pACYC184 cloning                                                       |
| Z0463rev         | TCTAGACCGCCTGTTGACCGTTATTG pACYC184 cloning                                                       |
| Z0461lambdaredP1 | GCAATCAGAGTAGAGGTAAAGGTCATTTTCATTGTTTTATCCTTC<br>GAGCGTGAGTGGTGGTGTATGCCCGCTGTGTAGGCTGGAGCTGCTTCG |
| Z0461lambdaredP2 | TTCATATAGTCAGCAACATGGAGACAACCATGCACGCGCGTTCAGCG<br>AGAGAAATTAATCAATGCCATATGAATATCCTCCTTAG         |

|              |                                                                                                |
|--------------|------------------------------------------------------------------------------------------------|
| AP-FucR-P1   | TAA AGG TCA GTA AAG AAA CCA TTC GTC GCG ATC TCA ATG AAT<br>TAT GTG TAG GCT GGA GCT GCT TCG     |
| AP-FucR-P2   | GCT ATC GAT CCC TTC ACA AGA AAA AAT AAA CAG ATC GAT TTC<br>CAG CGA TTC ATA TGA ATA TCC TCC TTA |
| Ler-lred-P1- | ATG CGG AGA TTA TTT ATT ATG AAT ATG GAA AAT AAT TCA CAT<br>ACA ACA AG GTGTAGGCTGGAGCTGCTTCG    |
| Ler-lred-P2  | TTC AGT GTC CTT CAC AAG AAA ATC TTC TTT CTT CAT TCC ATT<br>CAA CAG TGC ATA TGA ATA TCC TCC TTA |

**Oligonucleotides used for Real time PCR**

|             |                      |
|-------------|----------------------|
| Ler         | 6                    |
| escC        | 6                    |
| escV        | 6                    |
| Eae         | 6                    |
| espA        | 6                    |
| rpoA        | 6                    |
| Z0461-201F1 | AACCCGCCGCAGCTTT     |
| Z0461-262R1 | TGGCCACAAATGCTGATT   |
| Z0463-343R1 | CGGTGCCAGCGGGTATT    |
| Z0463F      | GCGCACCGCCTGTACTAACT |
| afuAF-887F1 | TCGCCAAACGCTTTGGTT   |

|             |                         |
|-------------|-------------------------|
| afuB-1809F1 | AGCCGGCATCGAAATAATGAC   |
| afuB-1870R1 | GGTCCGCCCGTTTCGT        |
| afuC-894F1  | CCAGACGCAAAATGGTGGTT    |
| afuC-952R1  | GCAAATGGTGACGCTGCTT     |
| fucA-269F   | GGCGCGCAAGGAATAGAA      |
| fucA-328R   | GATCCCCGCTATTCACTACATGA |
| fucP-1139F  | CCAAATACGGTTCGTCCTTCA   |
| fucP-1206R  | ACCCATGACCGGAGTGACAA    |
| fucR-260F   | CGCTCGCGTGGATTGAA       |
| fucR-326R   | GCCAGATACCAGCAAGTTGAACT |

**Primers used for EMSAs**

|           |                                  |
|-----------|----------------------------------|
| Ler-299FP | 5'-ATGCAATGCGATCTATCTATC-3'      |
| Ler-18FPr | 5'-GGAAGGACCAATTAATC-3'          |
| Ler+86R   | 5'-GCTTCCTGCTGTAGAACTGC-3'       |
| Ler-42F   | 5'-GTGGTTGTTTGATGAAATAGATGTG-3'  |
| Ler-218F  | 5'-CGCTTAACTAAATGGAAATGC-3'      |
| KanF      | 5'-CCGGAATTGCCAGCTGGGGCG-3'      |
| KanR      | 5'-TCTTGTTCAATCATGCGAAACGATCC-3' |

---

**Supplemental Table 4.** Number of genes with altered expression in Z0462- and Z0463- compared to WT. The GeneChip *E. coli* Genome 2.0 array system of the Affymetrix system was used to compare the gene expression in strain 86-24 to that in *fusK*- and *fusR*- strains. The output from the scanning of the Affymetrix GeneChip® *E. coli* 2.0 were obtained using GCOS v 1.4 according to manufacturer’s instructions. Comparisons were performed using the analysis tools within GCOS v 1.4, by selecting the appropriate array, CHP file for comparison, and baseline values. Custom analysis scripts were written in Perl to complete multiple array analyses. Expression data can be accessed using accession number (GSE34991) at the NCBI GEO database.

|               | <b>Increased</b> | <b>Decreased</b> | <b>No Change</b> |
|---------------|------------------|------------------|------------------|
| <b>Z0462-</b> | 785              | 433              | 8279             |
| <b>Z0463-</b> | 660              | 273              | 8004             |



**Supplemental Table 5. Metabolic genes in the gene arrays. None of these had their expression changed.**

| EHEC <i>fusK</i> - |                 | EHEC <i>fusR</i> - |          |        |                                                                                      |
|--------------------|-----------------|--------------------|----------|--------|--------------------------------------------------------------------------------------|
| 0.1 no change      | 0.5 rpiA        | 0.5 no change      | 0.069813 | rpiA   | ribose-5-phosphate isomerase A                                                       |
| 0 no change        | 0.532344 yggF   | -0.6 no change     | 0.916174 | yggF   | fructose-1,6-bisphosphatase II-like protein                                          |
| -0.2 no change     | 0.5 yqgP        | -0.5 no change     | 0.99288  | yqgP   | putative oxidoreductase                                                              |
| 0 no change        | 0.5 cmtA        | -0.8 no change     | 0.990708 | cmtA   | predicted fused mannitol-specific PTS enzymes: IIB component/IIC component           |
| -0.9 no change     | 0.990708 galP   | -1.5 no change     | 0.988955 | galP   | D-galactose transporter                                                              |
| -0.5 no change     | 0.5 ebgA        | -0.9 no change     | 0.747149 | ebgA   | cryptic beta-D-galactosidase, alpha subunit                                          |
| 0.2 no change      | 0.118009 ebgC   | -1 no change       | 0.952736 | ebgC   | cryptic beta-D-galactosidase subunit beta                                            |
| 1.8 no change      | 0.124552 ygjK   | 1.1 no change      | 0.5      | ygjK   | putative glycosyl hydrolase                                                          |
| -2.7 no change     | 0.900148 exuT   | -1.3 no change     | 0.838962 | exuT   | hexuronate transporter                                                               |
| 0.2 no change      | 0.5 agaV        | -1.7 no change     | 0.995927 | agaV   | N-acetylgalactosamine-specific PTS system transporter subunit IIB                    |
| -0.7 no change     | 0.715033 agaW   | -1.5 no change     | 0.990708 | agaW   | N-acetylgalactosamine-specific PTS system enzyme IIC component                       |
| 0.2 no change      | 0.5 agaB        | 0.1 no change      | 0.545234 | agaB   | putative N-acetylgalactosamine-6-phosphate deacetylase                               |
| 1.6 no change      | 0.5 agaC        | 1.4 no change      | 0.441923 | agaB   | N-acetylgalactosamine-specific PTS system transporter subunit IIB                    |
| 2.5 no change      | 0.177412 agaD   | 1.2 no change      | 0.5      | agaC   | N-acetylgalactosamine-specific PTS system transporter subunit IIC                    |
| 0.4 no change      | 0.60871 agaD    | -0.6 no change     | 0.934434 | agaD   | N-acetylgalactosamine-specific PTS system transporter subunit IID                    |
| 0.3 no change      | 0.62112 agaI    | -2.2 no change     | 0.975245 | agaI   | galactosamine-6-phosphate isomerase                                                  |
| -0.1 no change     | 0.39129 yraM    | -0.6 no change     | 0.996301 | yraM   | putative glycosylase                                                                 |
| -0.6 no change     | 0.930187 ptsN   | -0.3 no change     | 0.558077 | ptsN   | sugar-specific enzyme IIA component of PTS                                           |
| -1.1 no change     | 0.5 nanE        | -0.6 no change     | 0.934434 | nanE   | N-acetylmannosamine-6-phosphate 2-epimerase                                          |
| 1.3 no change      | 0.016731 nanT   | 0.3 no change      | 0.354442 | nanT   | putative sialic acid transporter                                                     |
| 0.9 no change      | 0.01421 nanR    | -0.2 no change     | 0.5      | nanR   | N-acetylneuraminate lyase                                                            |
| 0.7 no change      | 0.009292 nanR   | 0.1 no change      | 0.177412 | nanR   | transcriptional regulator NanR                                                       |
| -0.5 no change     | 0.5 frlB        | -1 no change       | 0.997247 | frlB   | fructoselysine-6-P-deglycase                                                         |
| 0.2 no change      | 0.044149 frlC   | -0.4 no change     | 0.5      | frlC   | fructoselysine 3-epimerase                                                           |
| 2 no change        | 0.038415 gntT   | 1.9 no change      | 0.054022 | gntT   | gluconate permease                                                                   |
| -0.2 no change     | 0.757415 malQ   | no change          |          | malQ   | 4-alpha-glucanotransferase                                                           |
| -0.5 no change     | 0.921063 malP   | no change          |          | malP   | malto-dextrin phosphorylase                                                          |
| -0.1 no change     | 0.5 glgC        | -1 no change       | 0.998168 | glgC   | glucose-1-phosphate adenylyltransferase                                              |
| 0 no change        | 0.5 glgX        | -1.1 no change     | 0.998349 | glgX   | glycogen debranching enzyme                                                          |
| -0.4 no change     | 0.5 glgB        | -1.5 no change     | 0.999899 | glgB   | glycogen branching enzyme                                                            |
| 1.2 no change      | 0.274048 gntU   | 0.4 no change      | 0.493524 | gntU   | low affinity gluconate transporter                                                   |
| 0.7 no change      | 0.026698 gntU   | -0.5 no change     | 0.805199 | gntU   | low affinity gluconate transporter                                                   |
| 0.6 no change      | 0.083826 ugpE   | -1 no change       | 0.977068 | ugpE   | glycerol-3-phosphate transporter membrane protein                                    |
| 1.5 no change      | 0.008511 ugpA   | 0.1 no change      | 0.757415 | ugpA   | glycerol-3-phosphate transporter permease                                            |
| 0 no change        | 0.124552 ugpB   | -0.8 no change     | 0.930187 | ugpB   | glycerol-3-phosphate transporter periplasmic binding protein                         |
| 0.7 no change      | 0.153232 dctA   | -0.8 no change     | 0.757415 | dctA   | C4-dicarboxylate transporter DctA                                                    |
| 0.2 no change      | 0.5 xylB        | 0.5 no change      | 0.001486 | xylB   | xylulokinase                                                                         |
| -0.7 no change     | 0.747149 xylA   | -0.5 no change     | 0.5      | xylA   | xylose isomerase                                                                     |
| -0.7 no change     | 0.796129 xylF   | -1.9 no change     | 0.981872 | xylF   | D-xylose transporter subunit XylF                                                    |
| -0.2 no change     | 0.274048 xylG   | -1.1 no change     | 0.796129 | xylG   | xylose transporter ATP-binding subunit                                               |
| 0.4 no change      | 0.088938 xylH   | 0.2 no change      | 0.153232 | xylH   | putative membrane component of xylose transport system                               |
| 1.7 no change      | 0.061522 uhpT   | -0.3 no change     | 0.938478 | uhpT   | sugar phosphate antiporter                                                           |
| -1.2 no change     | 0.991489 uhpA   | -2.2 no change     | 0.961585 | uhpA   | DNA-binding transcriptional activator UhpA                                           |
| -0.5 no change     | 0.506476 bglB   | 0.9 no change      | 0.681091 | bglB   | 6-phospho-beta-glucosidase bglB                                                      |
| -2.8 no change     | 0.992212 bglF   | -5.4 no change     | 0.986922 | bglF   | fused beta-glucoside-specific PTS enzymes: IIA component/IIB component/IIC component |
| -0.3 no change     | 0.681091 rbsA   | -0.9 no change     | 0.996645 | rbsA   | D-ribose transporter ATP binding protein                                             |
| -0.8 no change     | 0.894337 rbsC   | -1.3 no change     | 0.995927 | rbsC   | ribose ABC transporter permease protein                                              |
| 0 no change        | 0.506476 frvB   | -1.5 no change     | 0.945978 | frvB   | putative PTS transporter components IIBC                                             |
| 0.5 no change      | 0.008511 frvA   | -3.1 no change     | 0.757415 | frvA   | putative fructose-like phosphotransferase system subunit EIIA                        |
| 0.8 no change      | 0.041201 rhaM   | -0.2 no change     | 0.645558 | rhaM   | L-rhamnose mutarotase                                                                |
| -1.5 no change     | 0.852061 rhaD   | -1.1 no change     | 0.814869 | rhaD   | rhamnulose-1-phosphate aldolase                                                      |
| -1.1 no change     | 0.822588 rhaA   | -1.5 no change     | 0.545234 | rhaA   | L-rhamnose isomerase                                                                 |
| 0.7 no change      | 0.153232 rhaB   | -1.6 no change     | 0.938478 | rhaB   | rhamnulokinase                                                                       |
| 0.1 no change      | 0.145682 rhaS   | 0.2 no change      | 0.274048 | rhaS   | transcriptional activator RhaS                                                       |
| 0.5 no change      | 0.013078 rhaR   | -0.1 no change     | 0.454766 | rhaR   | transcriptional activator RhaR                                                       |
| -0.5 no change     | 0.757415 glpX   | -1.2 no change     | 0.830902 | glpX   | fructose 1,6-bisphosphatase II                                                       |
| 0.7 no change      | 0.083826 glpK   | 0.1 no change      | 0.5      | glpK   | glycerol kinase                                                                      |
| 0.3 no change      | 0.153232 frwC   | -1 no change       | 0.894337 | frwC   | putative fructose-like permease EIIC subunit 2                                       |
| -1.3 no change     | 0.94878 frwB    | -1.2 no change     | 0.5      | frwB   | putative fructose-like phosphotransferase EIIB subunit 2                             |
| 0.9 no change      | 0.065566 xylE   | -0.5 no change     | 0.905721 | xylE   | D-xylose transporter XylE                                                            |
| -0.7 no change     | 0.966696 malG   | -1.9 no change     | 0.99997  | malG   | maltose transporter permease                                                         |
| -0.1 no change     | 0.875448 ytfT   | -1.2 no change     | 0.999135 | ytfT   | predicted sugar transporter subunit: membrane component of ABC superfamily           |
| -0.5 no change     | 0.822588 yjfF   | -0.3 no change     | 0.952736 | yjfF   | predicted sugar transporter subunit: membrane component of ABC superfamily           |
| 0.5 no change      | 0.274048 fbp    | 1.2 no change      | 0.004481 | fbp    | fructose-1,6-bisphosphatase                                                          |
| 0.2 no change      | 0.019624 nagC   | 0 no change        | 0.330589 | nagC   | transcriptional repressor of N-acetylglucosamine operon                              |
| 0.2 no change      | 0.013078 nagE   | -0.1 no change     | 0.5      | nagE   | N-acetyl glucosamine specific PTS system components IIAABC                           |
| -0.4 no change     | 0.429141 Z2474m | -3.1 no change     | 0.875448 | Z2474m | sugar-binding periplasmic protein                                                    |
| 2.4 no change      | 0.111714 Z2474m | -1.9 no change     | 0.506476 | Z2474m | sugar-binding periplasmic protein                                                    |
| 1.6 no change      | 0.330589 ycjM   | -0.5 no change     | 0.900148 | ycjM   | glycosidase                                                                          |
| -0.1 no change     | 0.715033 murQ   | -1.9 no change     | 0.973302 | murQ   | N-acetylmuramic acid-6-phosphate etherase                                            |
| 0.2 no change      | 0.5 murP        | -0.8 no change     | 0.5      | murP   | N-acetylmuramic acid phosphotransfer permease                                        |

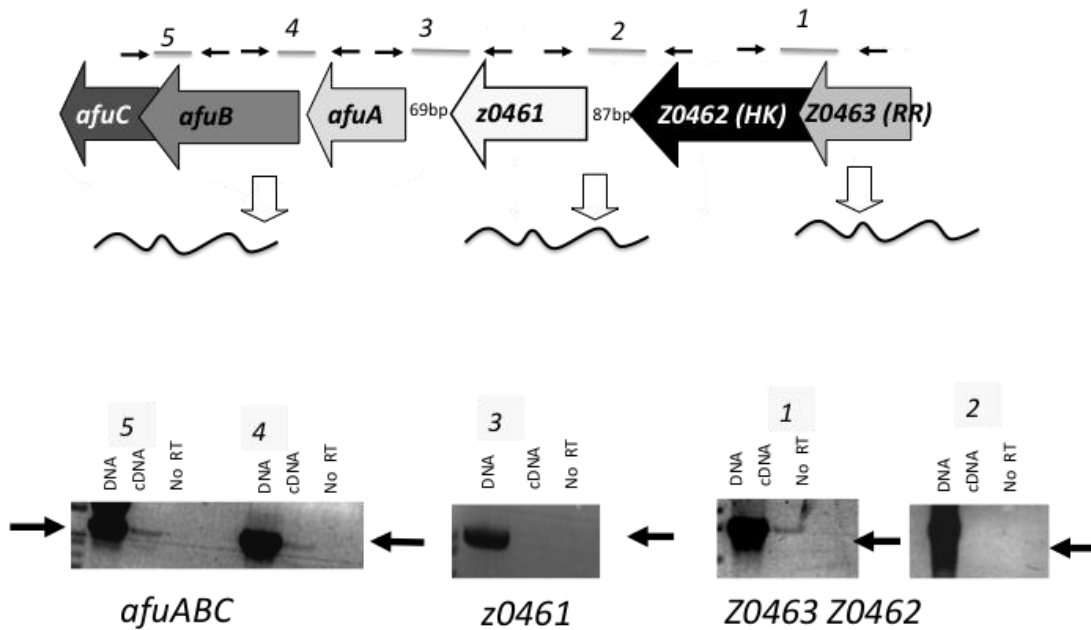

**Supplementary Figure 1.** Genetic organization of OI-20 depicting the number base pairs (bp) between the different transcriptional units. Operonic structure of OI-20 by RT-PCR. . Numbers 1-5 show location of primer sets used to map junction between genes. Primers (1) flanking *z0462* and *z0463* show no product when no RT is added (No RT) and product when using either the genomic DNA (DNA) control or cDNA (cDNA), suggesting that *z0462* and *z0463* are co-transcribed. Primers (2) flanking *z0462* and *z0461* show no product when no RT is added (No RT) or with cDNA (cDNA), and product when using genomic DNA (DNA), suggesting that *z0462* and *z0461* are in independent transcriptional units. Primers (3) flanking *z0461* and *afuA* show no product when no RT is added (No RT) or with cDNA (cDNA), and product when using genomic DNA (DNA), suggesting that *z0461* and *afuA* are in independent transcriptional units. Primers (4) flanking *afuA* and *afuB* show no product when no RT is added (No RT) and product when using either the genomic DNA (DNA) control or cDNA (cDNA), suggesting that *afuA* and *afuB* are co-transcribed. Primers (5) flanking *afuB* and *afuC*

show no product when no RT is added (No RT) and product when using either the genomic DNA (DNA) control or cDNA (cDNA), suggesting that *afuB* and *afuC* are co-transcribed

Z0462 (HK)

Putative sensor kinase

Search for sequence similarity (BLAST)

- EHEC
- *Citrobacter rodentium*

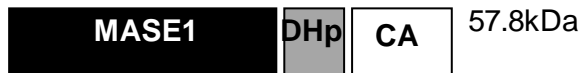

Z0463 (RR)

Putative response regulator

- EHEC
- *Citrobacter rodentium*

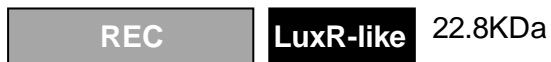

**Supplementary Figure 2.** Domain organization of Z0462 and Z0463.

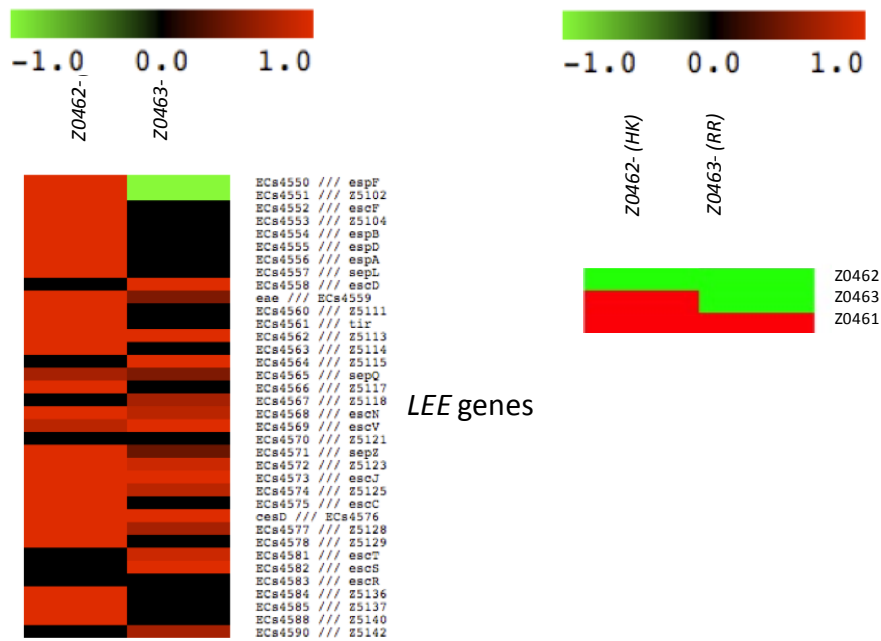

**Supplementary Figure 3.** Heat map from microarray analysis representing genes with altered expression in the *z0462-* and *z0463-* compared to WT.

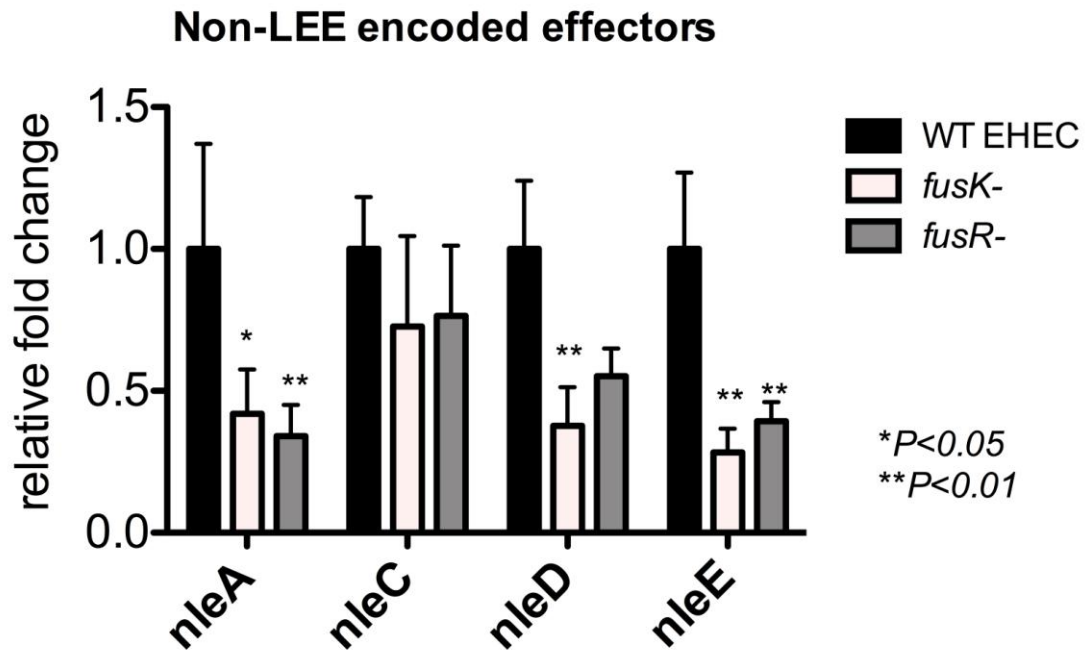

**Supplementary Figure 4.** qRT-PCR of genes encoding non-LEE effectors (*nle*). RNA was extracted from strains grown in DMEM to an  $OD_{600}$  1.0. ( $n=18$  biological samples per strain; asterisk,  $P < 0.05$ ; two asterisks,  $P < 0.01$ ; Student's *t*-test). These data show that expression of *nleA*, *nleD* and *nleE* is decreased in the *fusK* and *fusR* mutants suggesting that FusKR activates expression of these genes. Expression of *nleC* is unaltered in these mutants, suggesting that *nleC* is not regulated by FusKR.

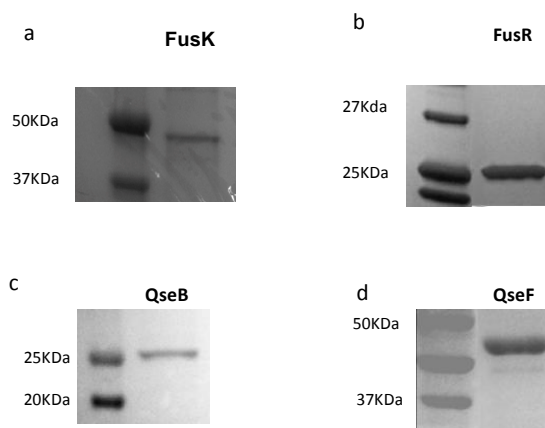

**Supplementary Figure 5. Commassie gels depicting the purified proteins used in this study. a,** Commassie gel of purified FusK. **b,** Commassie gel of purified FusR. **c,** Commassie gel of purified QseB. **d,** Commassie gel of purified QseF

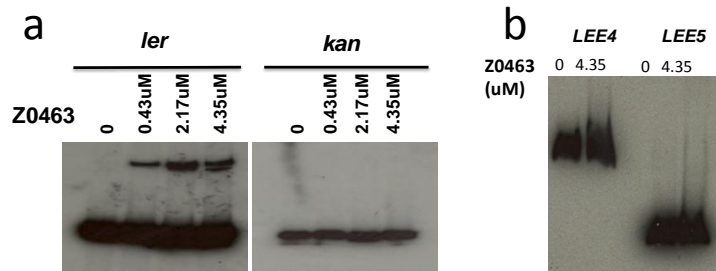

**Supplementary Figure 6. a**, EMSAs of *ler* and *kan* (negative control) probes with Z0463. These data show that Z0463 repress transcription of *ler* by directly interacting with its promoter. **b**, EMSAs of *LEE4* and *LEE5* probes with Z0463. These data show that repression of *LEE4* and *LEE5* transcription by Z0463 is indirect, and probably occurs in a cascade fashion through Ler.



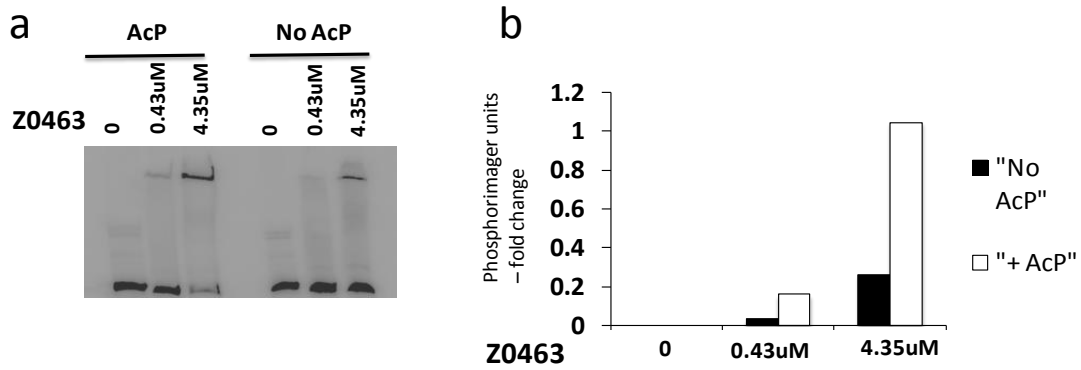

**Supplementary Figure 7. a**, EMSA of *ler* with Z0463 in the absence and presence of acetyl phosphate (AcP). These data demonstrate that Z0463 binds to the *ler* promoter with higher affinity when phosphorylated. **b**, Quantification of bound probe with and without AcP. Quantification was performed using a Storm phosphorimager.

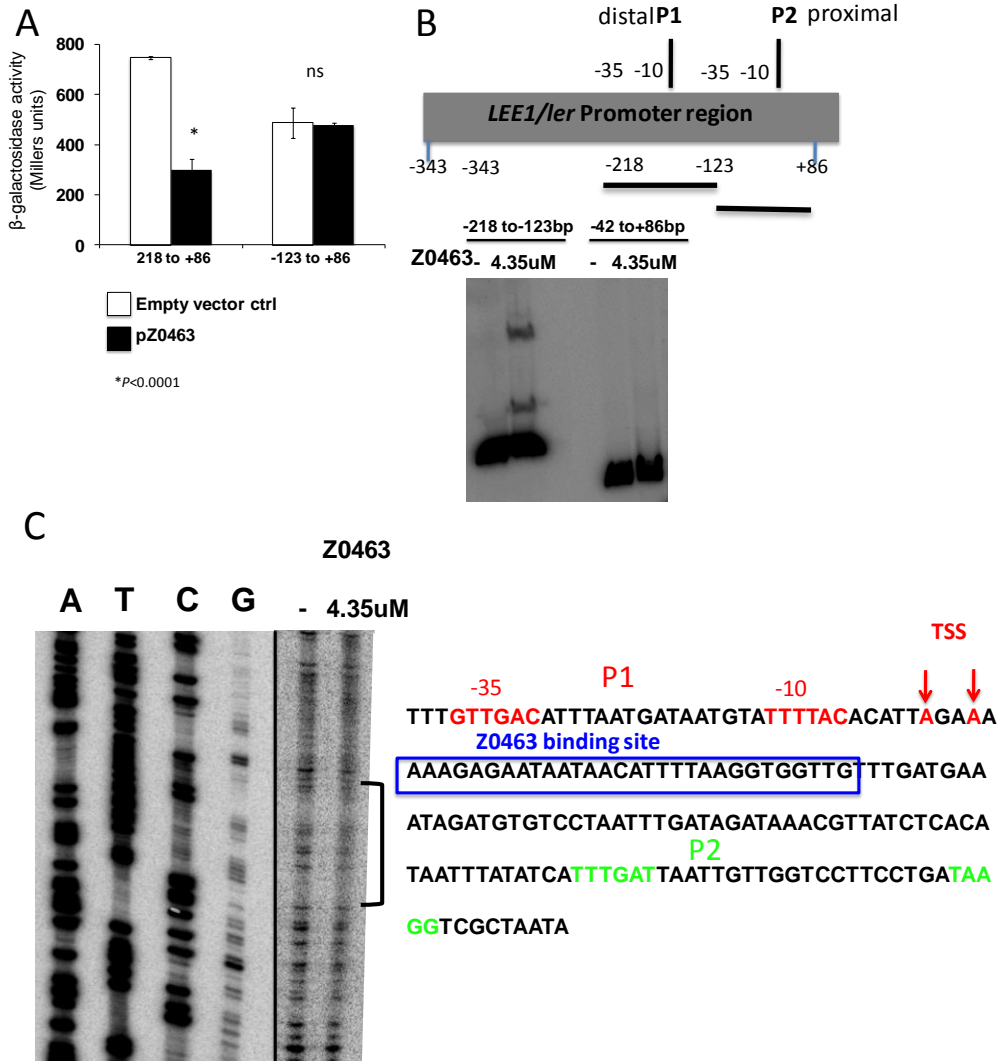

**Supplementary Figure 8.** Z0463 directly repress *ler* (*LEE1*) transcription. **a**, Nested deletion analyses of the *LEE1* (*ler*) promoter region. Transcriptional fusions of different fragments from the *LEE1* regulatory region (-218 to +86bp and -123 to +86bp) were generated and introduced into the K-12 MC4100 strain genome (does not have the Z0463), and assayed for  $\beta$ -lactamase activity in the presence of empty vector or Z0463. ( $n=6$  biological samples per strain; asterisk,  $P<0.0001$ ; ns,  $P>0.05$ , Student's *t*-test). **b**, EMSA of smaller fragments of the *LEE1* promoter with Z0463 (with acetyl phosphate). **c**, DNA footprinting of the *LEE1* promoter with Z0463. The two *LEE1* promoters are

depicted in red (P1) and green (P2), and the Z0463 binding region is boxed in blue. These data show that Z0463 binds in a region within the P1 and P2 promoters to repress *ler* transcription.

### Undifferentiated HT29 cells

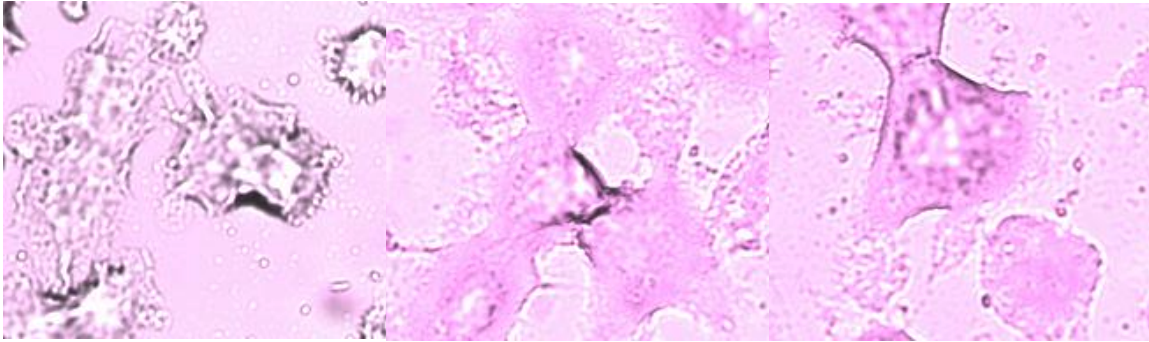

### Differentiated HT29 cells

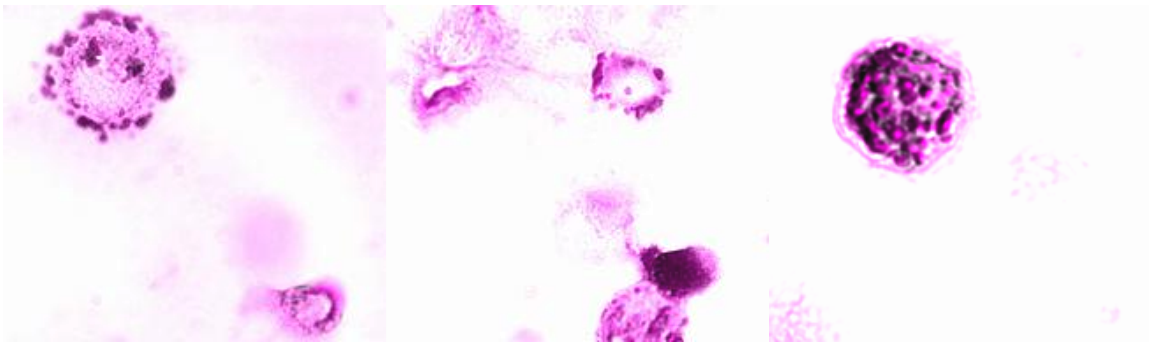

**Supplementary Figure 9.** Propionic acid Schiff staining (PAS) of undifferentiated (non mucus producing) and differentiated (mucus producing) HT29 cells.

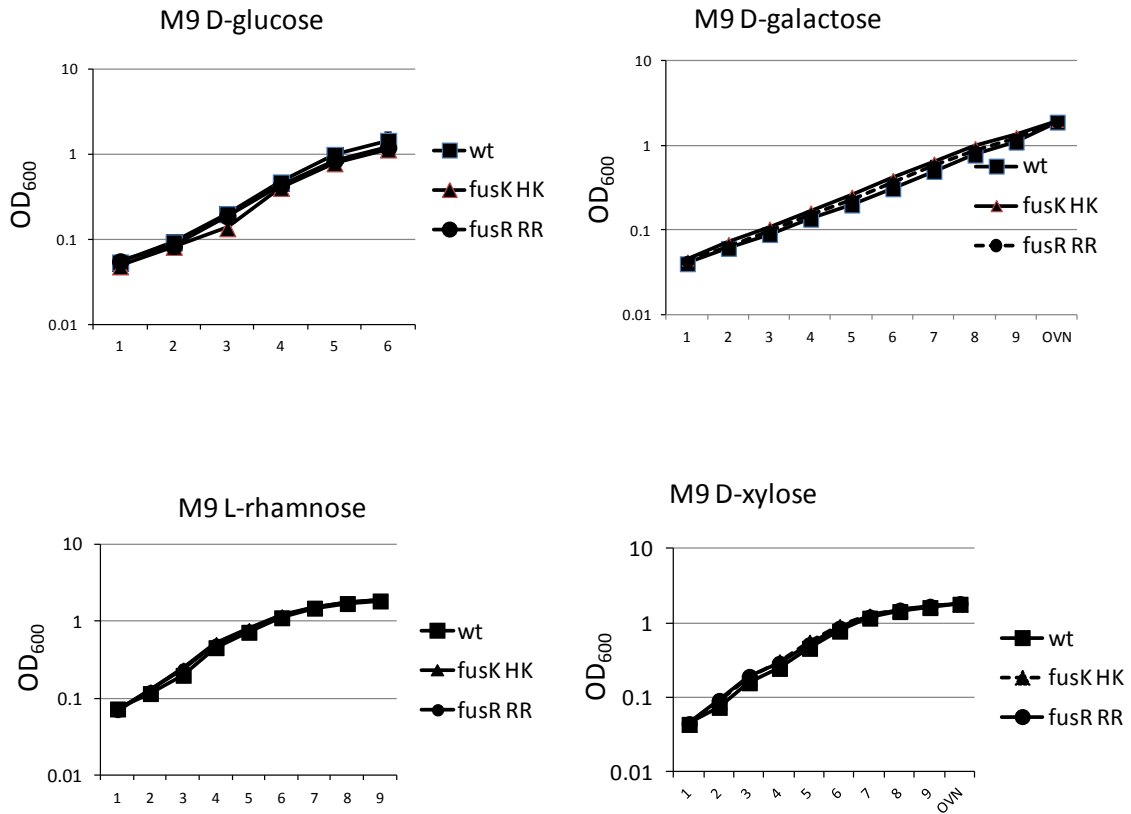

**Supplementary Figure 10.** Growth curves in M9 minimal media with different carbon sources. ( $n=6$  biological samples; significance between generation times calculated through Anova). No significant differences in generation times were observed.

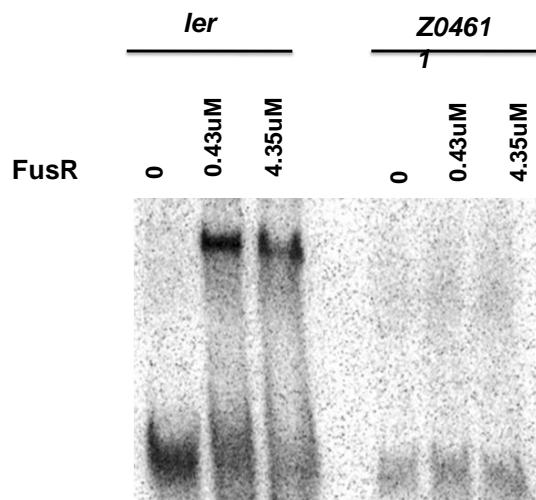

**Supplementary Figure 11.** EMSA of *LEE1* (*ler*) and *Z0461* regulatory regions with FusR (with acetyl phosphate) showing that FusR does not bind to the *z0461* regulatory region to repress its transcription.

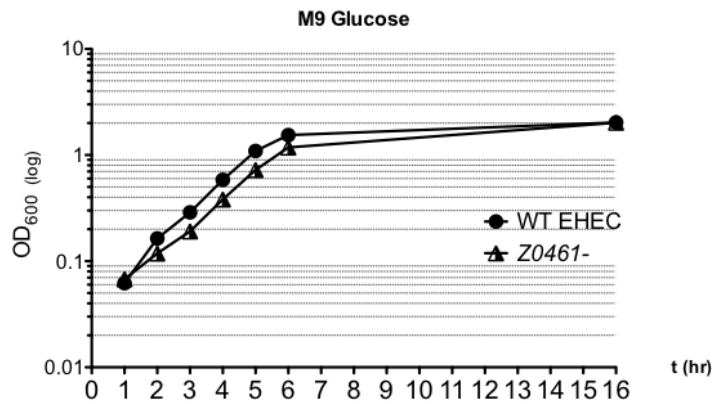

**Supplementary Figure 12.** Growth of WT and *z0461* mutant in M9 medium with glucose as a sole carbon source. These growth curves reflect 6 independent measurements. ( $n=6$  biological samples; significance between generation times calculated through Anova). No significant differences in generation times were observed.

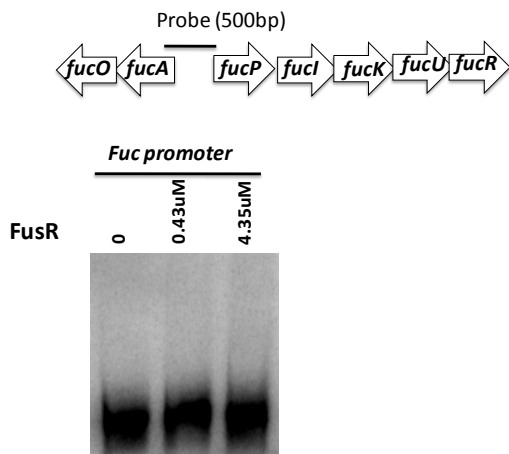

**Supplementary Figure 13.** EMSA of the *fucPIKUR* promoter with FusR (with acetyl phosphate) showing that FusR does not bind to this promoter region, and that repression of *fuc* expression by FusR is indirect.



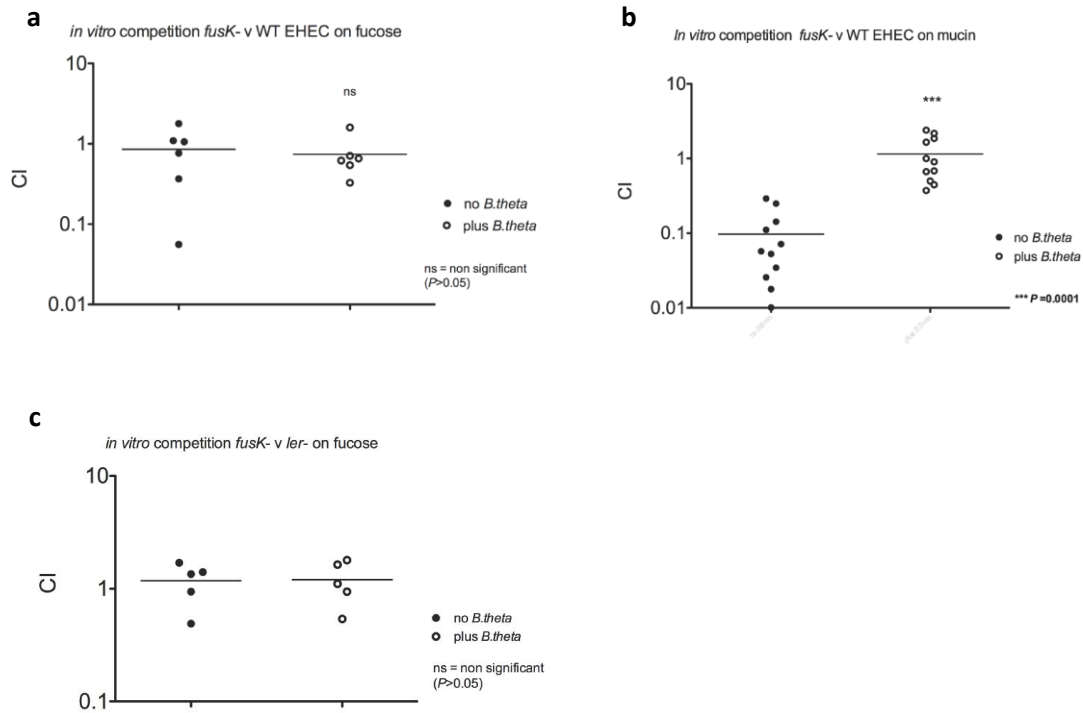

**Supplementary Figure 14.** *In vitro* growth competition assays in the absence or presence of *B. theta*. Competition assays were performed anaerobically at 37°C in DMEM (lacking glucose and pyruvate) with either L-fucose or mucin as sole C-sources in the absence or presence of *B. theta*. Enumeration of EHEC CFUs was performed by plating in McConkey agar in streptomycin (EHEC is streptomycin resistant), enumeration of the *fusK* mutant was performed by also plating in cholamphenicol (*fusK* mutant used in these assays is Cloramphenicol resistant). Competition index (CI) was calculated by dividing the *fusK* CFUs by WT CFUs, or *fusK* CFUs by *ler* CFUs. **a**, Competition between  $\Delta fusK$  and WT in DMEM no glucose with fucose. **b**, Competition between  $\Delta fusK$  and WT in DMEM no glucose with mucin. **c**, Competition between  $\Delta fusK$  and  $\Delta ler$  in DMEM no glucose with fucose. ( $n=5-11$ ; three asterisks,  $P < 0.0001$ ; ns,  $P > 0.05$ , Student's *t*-test).

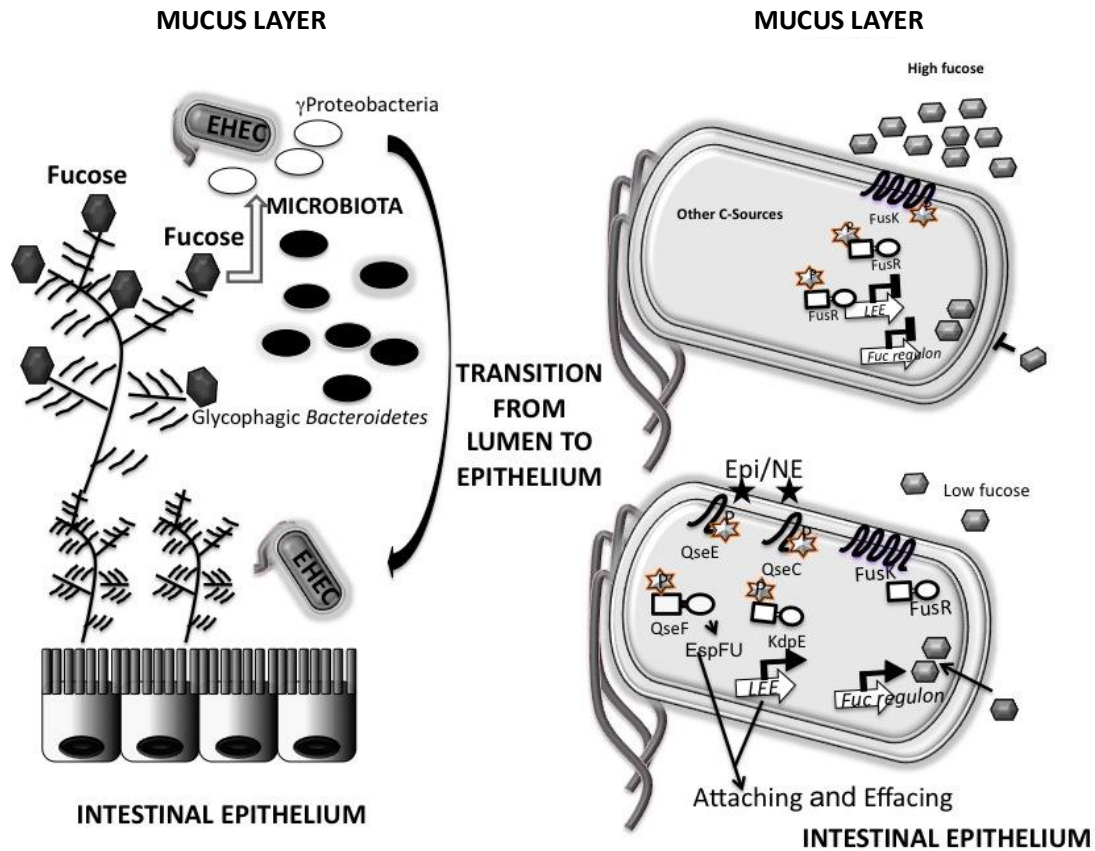

**Supplementary Figure 15.** Model of fucose sensing modulating intestinal colonization by EHEC. Fucose available in the mucus layer through *Bacteroidetes* degradation of host glycans inhibits LEE expression through FusKR. In proximity to the epithelial the QseCE adrenergic sensors repress *fusKR* de-repressing LEE expression, and also activate LEE expression through the KdpE RR.

## REFERENCES

- 1 Griffin, P. M., Ostroff, S. M., Tauxe, R. V., Greene, K. D., Wells, J. G., Lewis, J. H. *et al.* Illnesses associated with Escherichia coli O157:H7 infections. A broad clinical spectrum. *Ann Intern Med* **109**, 705-712 (1988).
- 2 Sperandio, V., Torres, A. G. & Kaper, J. B. Quorum sensing Escherichia coli regulators B and C (QseBC): a novel two-component regulatory system involved in the regulation of flagella and motility by quorum sensing in E. coli. *Mol Microbiol* **43**, 809-821 (2002).
- 3 Hughes, D. T., Clarke, M. B., Yamamoto, K., Rasko, D. A. & Sperandio, V. The QseC adrenergic signaling cascade in Enterohemorrhagic E. coli (EHEC). *PLoS Pathog* **5**, e1000553, (2009).
- 4 Reading, N. C., Torres, A. G., Kendall, M. M., Hughes, D. T., Yamamoto, K. & Sperandio, V. A novel two-component signaling system that activates transcription of an enterohemorrhagic Escherichia coli effector involved in remodeling of host actin. *J Bacteriol* **189**, 2468-2476, (2007).
- 5 Datsenko, K. A. & Wanner, B. L. One-step inactivation of chromosomal genes in Escherichia coli K-12 using PCR products. *Proc Natl Acad Sci U S A* **97**, 6640-6645, (2000).
- 6 Walters, M. & Sperandio, V. Autoinducer 3 and epinephrine signaling in the kinetics of locus of enterocyte effacement gene expression in enterohemorrhagic Escherichia coli. *Infect Immun* **74**, 5445-5455, (2006).
